# Supplementary material for: REV7 Monomer Is Unable to Participate in Double Strand Break Repair and Translesion Synthesis but Suppresses Mitotic Errors
Source: MDPI journal article supplement (doi:10.3390/ijms242115799), 2023-10-31
Supplement: s1 [file s1]

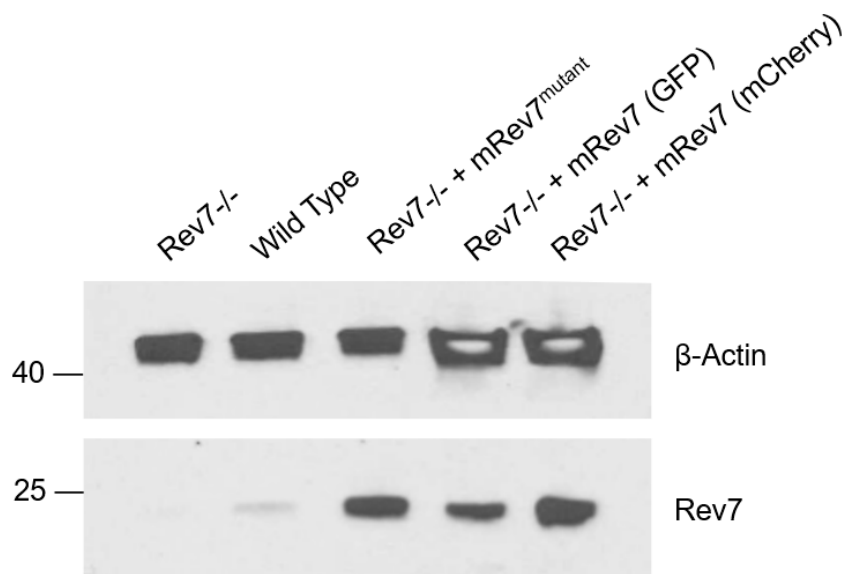

**Figure S1.** Validation of KP cells used in this study.

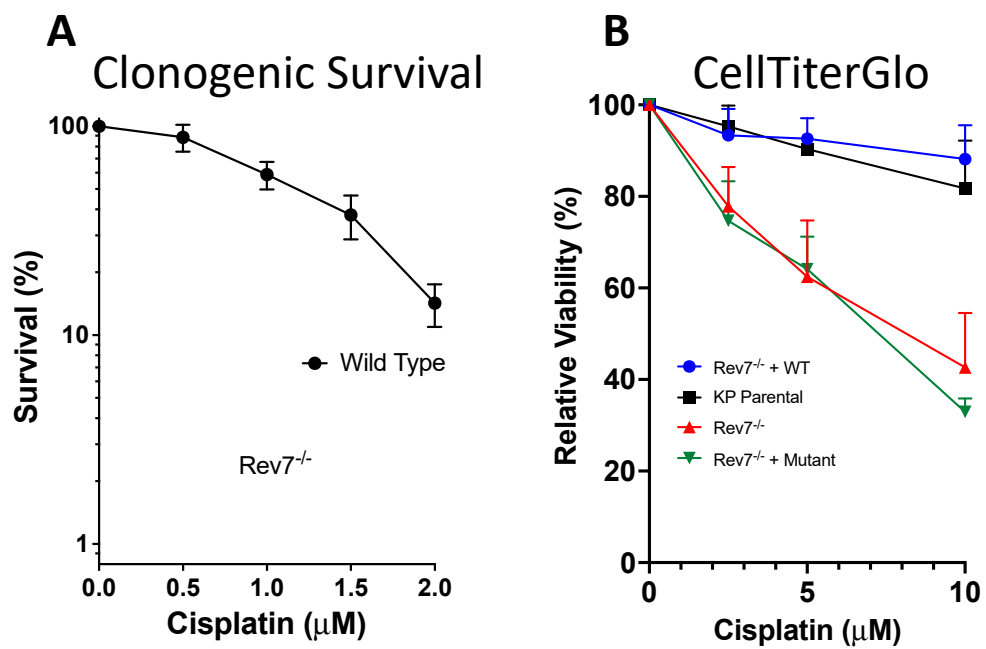

**Figure S2.** Comparison of (A) clonogenic survival or (B) CellTiter-Glo viability assay for killing of KP cells with cisplatin.

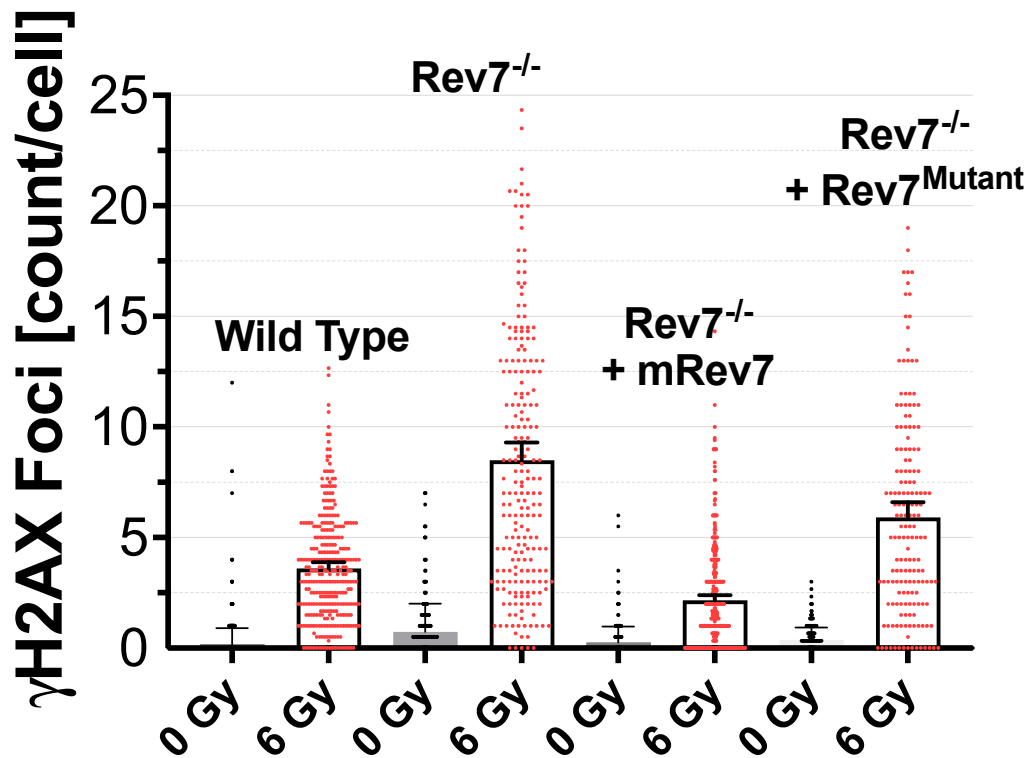

**Figure S3.** Analysis of γH2AX foci in KP cells that were either mock irradiated (0 Gy) or treated with X-rays (6 Gy). The genotype of the cells is indicated above the columns. Data represent the pooled results of three replicate wells.

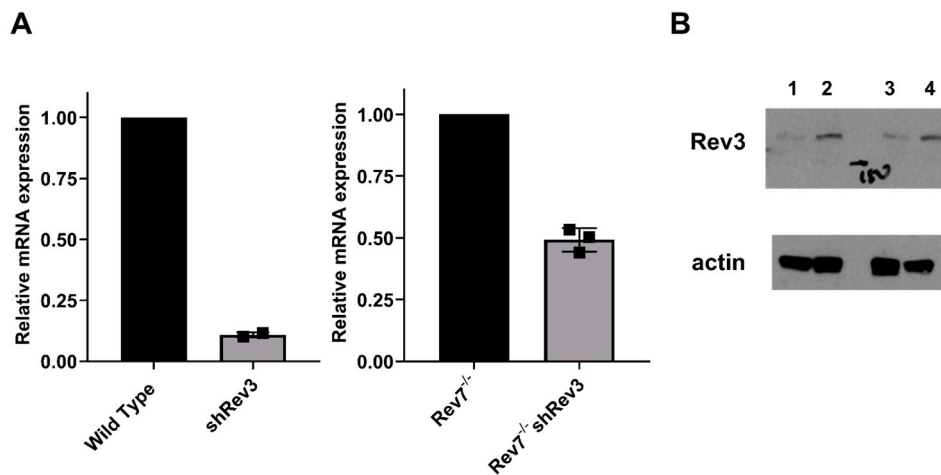

**Figure S4. Validation of knockdowns.** (A) Validation of Rev3 knockdown in KP cells by RT-qPCR. (B) Validation of Rev3 knockdown in KP cells by Western blot. 1: shRev3 2: wild type 3: Rev7<sup>-/-</sup> shRev3 4: Rev7<sup>-/-</sup>. The mark between lanes 2 and 3 indicates the 150 kDa molecular weight marker.

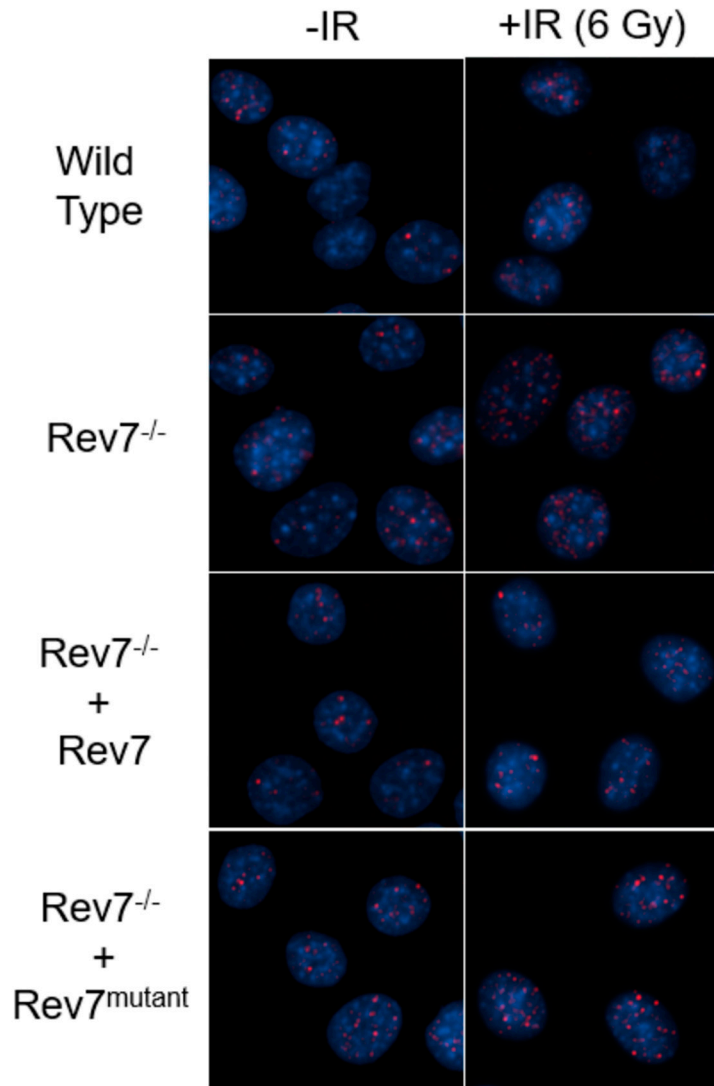

**Figure S5.** Representative Rad51 focus images (red) of KP cells stained with DAPI (blue).

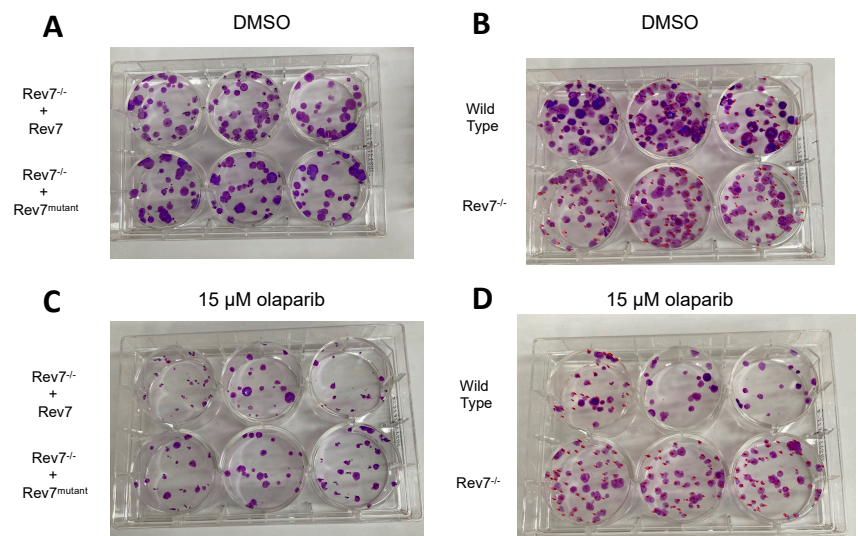

**Figure S6.** Representative images of crystal violet stained colonies growing in plates from clonogenic survival assay. (A) Rev7<sup>-/-</sup> cells

complemented with wild-type Rev7 (top) or Rev7<sup>mutant</sup> (bottom) under treatment with DMSO vehicle. (B) Parental KP cells (top) or Rev7<sup>-/-</sup> cells (bottom) under treatment with DMSO vehicle. (C) Rev7<sup>-/-</sup> cells complemented with wild-type Rev7 (top) or Rev7<sup>mutant</sup> (bottom) under treatment with 15  $\mu$ M olaparib. (D) Parental KP cells (top) or Rev7<sup>-/-</sup> cells (bottom) under treatment with  $\mu$ M olaparib.

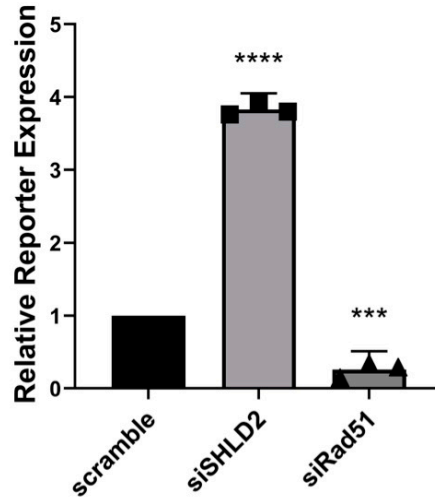

**Figure S7.** Validation of modified DR-GFP assay. U2OS cells transfected with non-targeting control siRNA (scramble) or siRNA targeting SHLD2 or Rad51 were subsequently analyzed using a functional assay for homology-directed repair. Green fluorescent reporter protein expression in cells transfected with siRNA targeting SHLD2 or Rad51 is reported relative to that of the non-targeting control. Each data point represents an independent experiment; error bars represent the standard deviation of the mean. Statistical significance calculated from an unpaired t-test is represented by \*\*\*\* ( $p < 0.001$ ) or \*\*\* ( $p < 0.01$ ).
